# Supplementary material
Source: bioRxiv or medRxiv preprint supplement (https://www.biorxiv.org/content/biorxiv/early/2019/03/05/568147/DC9/embed/media-9.pdf)
Supplement: Supplementary file [file media-9.pdf]

**Table S3: GeneCodis analysis**

**GO biological process**

**all signature genes**

| Genes    | NGR  | TNGR  | NG | TNG | Hyp | Hyp*     | Annotations                                                             |
|----------|------|-------|----|-----|-----|----------|-------------------------------------------------------------------------|
| 13 genes | 136  | 34208 |    | 13  | 341 | 0,000123 | 0,124843 GO:0006805: xenobiotic metabolic process (BP)                  |
| 9 genes  | 56   | 34208 |    | 9   | 341 | 0,000439 | 0,222782 GO:0007586: digestion (BP)                                     |
| 24 genes | 630  | 34208 |    | 24  | 341 | 0,002805 | 0,948987 GO:0055085: transmembrane transport (BP)                       |
| 13 genes | 181  | 34208 |    | 13  | 341 | 0,003935 | 0,998436 GO:0019221: cytokine-mediated signaling pathway (BP)           |
| 20 genes | 549  | 34208 |    | 20  | 341 | 0,082354 | 0,0001671 GO:0006811: ion transport (BP)                                |
| 30 genes | 1176 | 34208 |    | 30  | 341 | 0,299356 | 0,0005064 GO:0007165: signal transduction (BP)                          |
| 7 genes  | 75   | 34208 |    | 7   | 341 | 1,02096  | 0,0012953 GO:0060337: type I interferon-mediated signaling pathway (BP) |
| 9 genes  | 136  | 34208 |    | 9   | 341 | 0,965131 | 0,0013994 GO:0032496: response to lipopolysaccharide (BP)               |
| 3 genes  | 6    | 34208 |    | 3   | 341 | 1,92057  | 0,0021659 GO:0046483: heterocycle metabolic process (BP)                |
| 7 genes  | 88   | 34208 |    | 7   | 341 | 2,92364  | 0,0029675 GO:0008202: steroid metabolic process (BP)                    |

**downregulated signature genes**

| Genes    | NGR | TNGR  | NG | TNG | Hyp | Hyp*     | Annotations                                                             |
|----------|-----|-------|----|-----|-----|----------|-------------------------------------------------------------------------|
| 12 genes | 136 | 34208 |    | 12  | 225 | 1,21E-05 | 0,004089 GO:0006805: xenobiotic metabolic process (BP)                  |
| 9 genes  | 56  | 34208 |    | 9   | 225 | 1,14E-05 | 0,007686 GO:0007586: digestion (BP)                                     |
| 21 genes | 630 | 34208 |    | 21  | 225 | 0,00015  | 0,033903 GO:0055085: transmembrane transport (BP)                       |
| 19 genes | 549 | 34208 |    | 19  | 225 | 0,000513 | 0,086713 GO:0006811: ion transport (BP)                                 |
| 7 genes  | 88  | 34208 |    | 7   | 225 | 0,195953 | 0,0002649 GO:0008202: steroid metabolic process (BP)                    |
| 3 genes  | 6   | 34208 |    | 3   | 225 | 0,553433 | 0,0006235 GO:0046483: heterocycle metabolic process (BP)                |
| 4 genes  | 20  | 34208 |    | 4   | 225 | 0,081281 | 0,0006868 GO:0017144: drug metabolic process (BP)                       |
| 5 genes  | 41  | 34208 |    | 5   | 225 | 0,727521 | 0,0007025 GO:0006865: amino acid transport (BP)                         |
| 2 genes  | 2   | 34208 |    | 2   | 225 | 4,30713  | 0,0032351 GO:0046485: ether lipid metabolic process (BP)                |
| 8 genes  | 200 | 34208 |    | 8   | 225 | 5,77955  | 0,0039069 GO:0034641: cellular nitrogen compound metabolic process (BP) |

**upregulated signature genes**

| Genes    | NGR  | TNGR  | NG | TNG | Hyp | Hyp*      | Annotations                                                                                                          |
|----------|------|-------|----|-----|-----|-----------|----------------------------------------------------------------------------------------------------------------------|
| 7 genes  | 181  | 34208 |    | 7   | 116 | 0,296553  | 0,0015450 GO:0019221: cytokine-mediated signaling pathway (BP)                                                       |
| 8 genes  | 341  | 34208 |    | 8   | 116 | 2,24209   | 0,0058406 GO:0008285: negative regulation of cell proliferation (BP)                                                 |
| 14 genes | 1176 | 34208 |    | 14  | 116 | 4,62423   | 0,0080307 GO:0007165: signal transduction (BP)                                                                       |
| 3 genes  | 23   | 34208 |    | 3   | 116 | 6,40348   | 0,0083405 GO:0002504: antigen processing and presentation of peptide or polysaccharide antigen via MHC class II (BP) |
| 5 genes  | 136  | 34208 |    | 5   | 116 | 0,0001038 | 0,0108246 GO:0032496: response to lipopolysaccharide (BP)                                                            |
| 4 genes  | 93   | 34208 |    | 4   | 116 | 0,0002904 | 0,0116398 GO:0006414: translational elongation (BP)                                                                  |
| 4 genes  | 82   | 34208 |    | 4   | 116 | 0,0001790 | 0,0116601 GO:0060333: interferon-gamma-mediated signaling pathway (BP)                                               |
| 4 genes  | 82   | 34208 |    | 4   | 116 | 0,0001790 | 0,0116601 GO:0019083: viral transcription (BP)                                                                       |
| 4 genes  | 92   | 34208 |    | 4   | 116 | 0,0002786 | 0,0120989 GO:0045471: response to ethanol (BP)                                                                       |
| 2 genes  | 7    | 34208 |    | 2   | 116 | 0,0002367 | 0,0123351 GO:0019886: antigen processing and presentation of exogenous peptide antigen via MHC class II (BP)         |

**KEGG pathways**

**all signature genes**

| Genes    | NGR | TNGR  | NG | TNG | Hyp | Hyp*      | Annotations                                                         |
|----------|-----|-------|----|-----|-----|-----------|---------------------------------------------------------------------|
| 11 genes | 68  | 34208 |    | 11  | 341 | 7,6E-06   | 0,001102 (KEGG) 00980: Metabolism of xenobiotics by cytochrome P450 |
| 9 genes  | 70  | 34208 |    | 9   | 341 | 0,003334  | 0,024172 (KEGG) 00982: Drug metabolism - cytochrome P450            |
| 7 genes  | 61  | 34208 |    | 7   | 341 | 0,252841  | 0,0001222 (KEGG) 00830: Retinol metabolism                          |
| 6 genes  | 52  | 34208 |    | 6   | 341 | 1,29913   | 0,0004709 (KEGG) 00140: Steroid hormone biosynthesis                |
| 4 genes  | 26  | 34208 |    | 4   | 341 | 0,0001219 | 0,0035366 (KEGG) 00053: Ascorbate and aldarate metabolism           |
| 6 genes  | 84  | 34208 |    | 6   | 341 | 0,0001985 | 0,0035992 (KEGG) 05323: Rheumatoid arthritis                        |
| 5 genes  | 51  | 34208 |    | 5   | 341 | 0,0001541 | 0,0037253 (KEGG) 04978: Mineral absorption                          |
| 4 genes  | 29  | 34208 |    | 4   | 341 | 0,0001892 | 0,0039198 (KEGG) 00591: Linoleic acid metabolism                    |
| 7 genes  | 125 | 34208 |    | 7   | 341 | 0,0002683 | 0,0043236 (KEGG) 04514: Cell adhesion molecules (CAMs)              |
| 8 genes  | 172 | 34208 |    | 8   | 341 | 0,0003515 | 0,0050971 (KEGG) 05152: Tuberculosis                                |

**downregulated signature genes**

| Genes   | NGR | TNGR  | NG | TNG | Hyp | Hyp*      | Annotations                                                         |
|---------|-----|-------|----|-----|-----|-----------|---------------------------------------------------------------------|
| 9 genes | 68  | 34208 |    | 9   | 225 | 6,91E-05  | 0,000705 (KEGG) 00980: Metabolism of xenobiotics by cytochrome P450 |
| 7 genes | 70  | 34208 |    | 7   | 225 | 0,040902  | 2,08599 (KEGG) 00982: Drug metabolism - cytochrome P450             |
| 4 genes | 29  | 34208 |    | 4   | 225 | 3,80365   | 0,0012932 (KEGG) 00591: Linoleic acid metabolism                    |
| 5 genes | 61  | 34208 |    | 5   | 225 | 5,19025   | 0,0013235 (KEGG) 00830: Retinol metabolism                          |
| 3 genes | 23  | 34208 |    | 3   | 225 | 0,0004511 | 0,0076700 (KEGG) 00910: Nitrogen metabolism                         |
| 4 genes | 52  | 34208 |    | 4   | 225 | 0,0003851 | 0,0078574 (KEGG) 00140: Steroid hormone biosynthesis                |
| 4 genes | 62  | 34208 |    | 4   | 225 | 0,0007539 | 0,0109867 (KEGG) 00010: Glycolysis / Gluconeogenesis                |
| 4 genes | 70  | 34208 |    | 4   | 225 | 0,0011895 | 0,0151669 (KEGG) 03320: PPAR signaling pathway                      |
| 3 genes | 39  | 34208 |    | 3   | 225 | 0,0021548 | 0,0244212 (KEGG) 00620: Pyruvate metabolism                         |
| 3 genes | 53  | 34208 |    | 3   | 225 | 0,0051633 | 0,0438887 (KEGG) 00590: Arachidonic acid metabolism                 |

**upregulated signature genes**

| Genes   | NGR | TNGR  | NG | TNG | Hyp | Hyp*      | Annotations                                                       |
|---------|-----|-------|----|-----|-----|-----------|-------------------------------------------------------------------|
| 6 genes | 172 | 34208 |    | 6   | 116 | 2,78101   | 0,0026697 (KEGG) 05152: Tuberculosis                              |
| 4 genes | 66  | 34208 |    | 4   | 116 | 7,69183   | 0,0036920 (KEGG) 05140: Leishmaniasis                             |
| 4 genes | 86  | 34208 |    | 4   | 116 | 0,0002151 | 0,0041303 (KEGG) 03010: Ribosome                                  |
| 3 genes | 34  | 34208 |    | 3   | 116 | 0,0002105 | 0,0050534 (KEGG) 04940: Type I diabetes mellitus                  |
| 3 genes | 46  | 34208 |    | 3   | 116 | 0,0005185 | 0,0055313 (KEGG) 05150: Staphylococcus aureus infection           |
| 4 genes | 102 | 34208 |    | 4   | 116 | 0,0004129 | 0,0056631 (KEGG) 05142: Chagas disease (American trypanosomiasis) |
| 3 genes | 45  | 34208 |    | 3   | 116 | 0,0004859 | 0,0058312 (KEGG) 00514: Other types of O-glycan biosynthesis      |
| 4 genes | 113 | 34208 |    | 4   | 116 | 0,0006080 | 0,0058371 (KEGG) 04670: Leukocyte transendothelial migration      |
| 4 genes | 84  | 34208 |    | 4   | 116 | 0,0001964 | 0,0062875 (KEGG) 05323: Rheumatoid arthritis                      |
| 4 genes | 101 | 34208 |    | 4   | 116 | 0,0003977 | 0,0063644 (KEGG) 04620: Toll-like receptor signaling pathway      |

NGR = Number of annotated genes in the reference list;

TNGR = Total number of genes in the reference list;

NG = Number of annotated genes in the input list;

TNG = Total number of genes in the input list;

Hyp = Hypergeometric pValue; Hyp\* = Corrected hypergeometric pValue

Tabas-Madrid D, Nogales-Cadenas R, Pascual-Montano A: GeneCodis3: a non-redundant and modular enrichment analysis tool for functional genomics.

Nucleic Acids Research 2012; doi: 10.1093/nar/gks402

Nogales-Cadenas R, Carmona-Saez P, Vazquez M, Vicente C, Yang X, Tirado F, Carazo JM, Pascual-Montano A:

GeneCodis: interpreting gene lists through enrichment analysis and integration of diverse biological information. Nucleic Acids Research 2009; doi: 10.1093/nar/gkp416

Carmona-Saez P, Chagoyen M, Tirado F, Carazo JM, Pascual-Montano A: GENECODIS: A web-based tool for finding significant concurrent annotations in gene lists.

Genome Biology 2007 8(1):R3
